# Supplementary material for: Predicting drug-target interactions using restricted Boltzmann machines
Source: PubMed Central journal article supplement — Bioinformatics. 2013 Jun 19;29(13):i126–34. doi: 10.1093/bioinformatics/btt234 (PMC3694663; doi:10.1093/bioinformatics/btt234), 2013-06-19
Supplement: supp_btt234_Zeng.304.sup.1.pdf [file supp_btt234_Zeng.304.sup.1.pdf]

# Supplementary Material for

*“Predicting Drug-Target Interactions Using Restricted Boltzmann Machines”*

Yuhao Wang<sup>1</sup>  
Jianyang Zeng<sup>2,\*</sup>

April 16, 2013

The following is supplementary material which provides additional information to substantiate the claims of the paper. Section S1 presents descriptive statistics of the MATADOR and STITCH-based datasets that were tested in the paper. Section S2 visualizes part of a DTI network constructed based on the prediction results. Section S3 describes details of the K-fold cross-validation procedure, and the results of a 5-fold cross-validation test performed in the paper. In Section S4, we describe additional cross-validation tests to further compare methods “integrating data with distinction” and “using only a single data type only” with training data of the same size. Section S5 presents details of a simple logic based approach which follows the basic premise that similar drugs and targets should have similar interactions.

## **S1 Descriptive Statistics of the MATADOR and STITCH-Based Datasets**

Table S1 shows descriptive statistics of the MATADOR and STITCH-based datasets that were tested in the paper.

| Statistics                         | MATADOR-based data | STITCH-based data |
|------------------------------------|--------------------|-------------------|
| Number of drugs                    | 784                | 598               |
| Number of protein targets          | 2431               | 671               |
| Number of drug-target interactions | 13064              | 3296              |
| Number of direct interactions      | 7862               | 2532              |
| Number of indirect interactions    | 5202               | 764               |
| Number of binding interactions     | –                  | 2589              |
| Number of activation interactions  | –                  | 945               |
| Number of inhibition interactions  | –                  | 1493              |
| Average degree for a drug          | 16.7               | 5.5               |
| Average degree for a target        | 5.4                | 4.9               |

Table S1: Descriptive statistics for both MATADOR and STITCH-based datasets.

---

<sup>1</sup>Department of Automation, Tsinghua University, Beijing, 100084, P. R. China

<sup>2</sup>Institute for Interdisciplinary Information Sciences, Tsinghua University, Beijing, 100084, P. R. China

\*Corresponding authors: Jianyang Zeng, zengjy321@tsinghua.edu.cn.

## S2 Visualization of Drug-Target Interaction Networks

Fig. S1 visualizes part of a DTI network constructed based on the set of the 50 highest scoring interactions predicted by our algorithm using the MATADOR-based data.

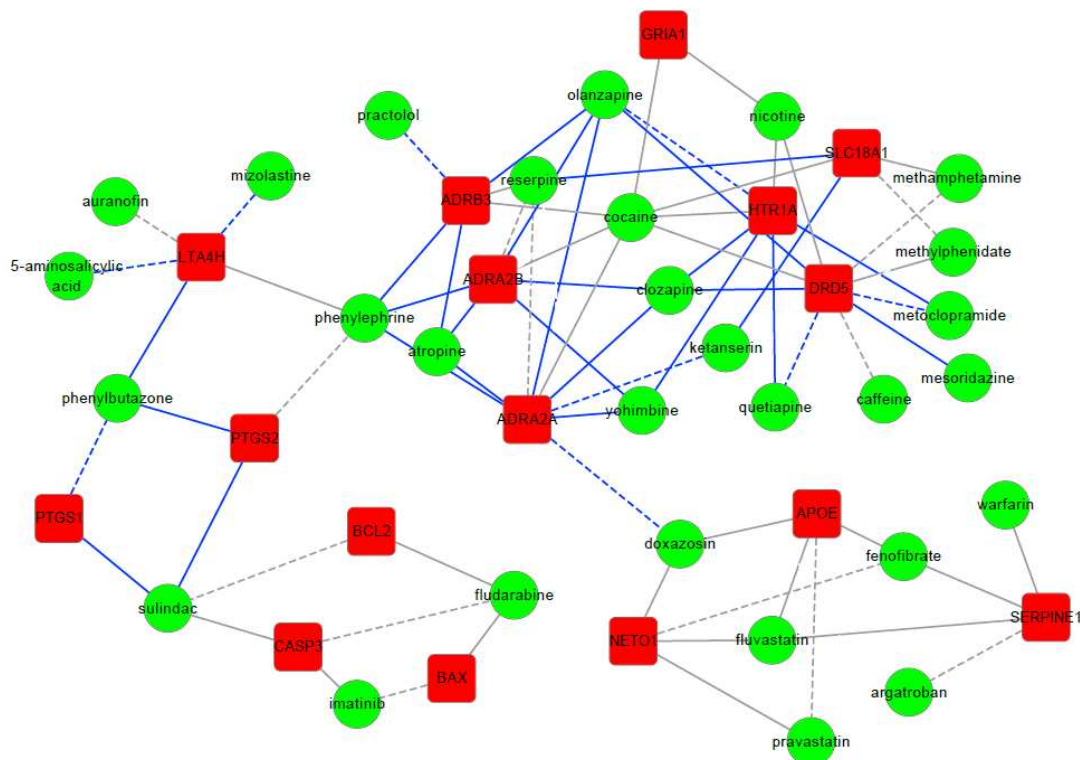

Figure S1: Part of the DTI network constructed based on the set of the 50 highest scoring interactions predicted using the MATADOR-based data. Solid links represent known interactions and dashed links represent predicted ones. Blue links represent direct interactions while grey ones represent indirect interactions. Green circles represent drugs while red squares represent target proteins. The network visualizations were prepared by Cytoscape [5].

## S3 Details of the K-Fold Cross-Validation Procedure

Our K-fold cross-validation test ( $K = 5$  or  $10$ ) was performed on drug-target interactions (DTIs). Below we describe the details of our K-fold cross-validation test. Suppose in total we have  $N$  drug-target interactions (DTIs), and  $t$  types of DTI encoded in a visible unit. Let  $\mathbf{x}_i = (x_i^1, \dots, x_i^h, \dots, x_i^t), i = 1, \dots, N$ , denote the state of the  $i$ th DTI, where  $x_i^h = 1$  if the  $h$ th type of DTI is observed in visible data, and  $x_i^h = 0$  otherwise. We randomly partitioned all DTIs,  $\mathbf{x}_1, \dots, \mathbf{x}_N$ , into  $K$  non-overlapping subsets, each of which had approximately equal size. Each subset was in turn used as test set and the remaining  $K - 1$  subsets were used as training data.

In the real application of the network based prediction of DTIs, we usually aim to predict a small number of unknown DTIs based on a large number of known DTIs. Thus, a cross-validation test with a small test data set and a large training data set should be sufficient enough to simulate the real scenario. Note that 10-fold cross-validation and leave-one-out cross-validation (LOOCV) tests have been widely used in previous work

on DTI prediction [9, 1, 6, 4]. To check whether our algorithm can have a wider range of applications, we also performed a 5-fold cross-validation test. The results of this 5-fold cross-validation test are summarized in Table S2. Compared to our original 10-fold cross-validation test (Table 1 in the paper), we only found a small decrease in our algorithm’s performance in the 5-fold cross-validation test.

| Drug-target relationship | AUC  | AUPR |
|--------------------------|------|------|
| Direct interaction       | 98.1 | 86.7 |
| Indirect interaction     | 96.5 | 74.8 |

Table S2: The 5-fold cross-validation results on predicting direct and indirect interactions using our RBM model. Both known direct and indirect interactions from the MATADOR-based data were integrated with distinction in our RBM model.

## S4 Additional Cross-Validation Tests

In our cross-validation tests, the size of training data are the same for the first two test methods, namely “integrating data with distinction” and “mixing data without distinction”. Thus, in these two tests, AUC and AUPR are comparable. The third test method, i.e., “using direct (indirect) interaction only”, used less training data than the first two test method. For example, when predicting direction interactions, the indirect interaction data was not used in the test. This may create bias when comparing two methods that use training data with different sizes. To make a fair comparison on methods “integrating data with distinction” and “using direct (indirect) interaction only”, we have performed an additional test which used training data of the same size. In this test, when predicting direct interaction, we removed an indirect interaction if either the drug or target does not have any direct interaction with other drugs or targets in the dataset. By doing so, we maintained the same data size for both methods. We also performed a similar test on predicting indirect DTIs. Table S3 shows the descriptive statistics for the new data used in this additional test. As summarized in Table S4, our new comparison results confirmed that integrating data with distinction outperformed the method that uses a single interaction type only, when predicting direct and indirect DTIs.

| Statistics                         | dataset for direct interaction prediction | dataset for indirect interaction prediction |
|------------------------------------|-------------------------------------------|---------------------------------------------|
| Number of drugs                    | 718                                       | 364                                         |
| Number of protein targets          | 1568                                      | 1558                                        |
| Number of drug-target interactions | 10211                                     | 8228                                        |
| Number of direct interactions      | 7862                                      | 3026                                        |
| Number of indirect interactions    | 2349                                      | 5202                                        |
| Average degree for a drug          | 14.2                                      | 22.6                                        |
| Average degree for a target        | 6.5                                       | 5.3                                         |

Table S3: Descriptive statistics for the dataset with the same size that was used for comparing methods “integrating data with distinction” and “using direct (indirect) interactions only”, when predicting direct and indirect DTIs.

In addition, we performed a similar comparison test for predicting different modes of action. Table S5 shows the descriptive statistics for the new data used for predicting different modes of action. As summarized in Table S6, the new comparison results also confirmed that integrating data with distinction outperformed the method that uses a single data type.

| Drug-target relationship | Test method                       | AUC  | AUPR        |
|--------------------------|-----------------------------------|------|-------------|
| Direct interaction       | Integrating data with distinction | 98.3 | <b>89.1</b> |
|                          | Using direct interactions only    | 98.0 | 78.9        |
| Indirect interaction     | Integrating data with distinction | 96.9 | <b>79.4</b> |
|                          | Using indirect interactions only  | 94.8 | 62.4        |

Table S4: Results on comparing methods “integrating data with distinction” and “using direct (indirect) interactions only” with training data of the same size, when predicting direct and indirect DTIs. The highest AUPR score is shown in bold.

| Statistics                         | dataset for binding interaction prediction | dataset for activation interaction prediction | dataset for inhibition interaction prediction |
|------------------------------------|--------------------------------------------|-----------------------------------------------|-----------------------------------------------|
| Number of drugs                    | 574                                        | 261                                           | 416                                           |
| Number of protein targets          | 526                                        | 261                                           | 384                                           |
| Number of drug-target interactions | 2952                                       | 1454                                          | 2253                                          |
| Number of direct interactions      | 2517                                       | 857                                           | 1673                                          |
| Number of indirect interactions    | 435                                        | 597                                           | 580                                           |
| Number of binding interactions     | 2589                                       | 899                                           | 1701                                          |
| Number of activation interactions  | 713                                        | 945                                           | 617                                           |
| Number of inhibition interactions  | 1326                                       | 614                                           | 1493                                          |
| Average degree for a drug          | 5.1                                        | 5.6                                           | 5.4                                           |
| Average degree for a target        | 5.6                                        | 5.6                                           | 5.9                                           |

Table S5: Descriptive statistics for the dataset with the same size used for comparing methods “integrating data with distinction” and “using a single interaction type only”, when predicting different modes of action.

| Drug-target relationship | Test method                        | AUC  | AUPR        |
|--------------------------|------------------------------------|------|-------------|
| Binding interaction      | Integrating data with distinction  | 94.7 | <b>77.3</b> |
|                          | Using binding interactions only    | 94.1 | 74.4        |
| Activation interaction   | Integrating data with distinction  | 89.5 | <b>62.6</b> |
|                          | Using activation interactions only | 87.7 | 56.3        |
| Inhibition interaction   | Integrating data with distinction  | 90.7 | <b>64.5</b> |
|                          | Using inhibition interactions only | 89.5 | 60.2        |

Table S6: Results on comparing methods “integrating data with distinction” and “using a single interaction type only” with training data of the same size, when predicting different modes of action. The highest AUPR score is shown in bold.

## S5 Details of the Simple Logic Based Approach

Previous network-based approaches for drug-target interaction prediction largely depended on the basic premise that similar drugs and targets should have similar interactions, and focused on integrating genomic and pharmacological data to represent the similarities of drugs, targets and their interactions and predict unknown interactions [9, 3, 2, 1, 7, 6, 4, 8]. Unfortunately, these previous approaches cannot be directly extended to represent the statistical structure of a multidimensional DTI network, and predict unknown types of DTIs. To capture the latent correlations among different types of DTIs on a multidimensional network, we have to resort to more effective prediction models. Our RBM-based approach extends the premise that similar drugs and targets should have similar interactions in that it not only considers the binary DTIs, but also captures the intrinsic correlations among different types of DTIs from the statistical structure of data.

As little work had been developed for predicting unknown types of DTIs on a multidimensional network, it was difficult for us to directly compare our work to other prediction approaches. Instead, we have compared our algorithm to a simple logic based approach on the MATADOR-based data. The simple logic based approach takes the same premise that similar drugs and targets should have similar interactions, which has been popularly used in previous DTI prediction approaches [9, 3, 2, 1, 7, 6, 4, 8]. In this simple logic based approach, we first defined a kernel, called *interaction type profile (ITP)* kernel, to measure the similarities of drugs and targets. The ITP kernel is similar to the Gaussian interaction profile kernel that has been used in [6], except that the interaction profiles are represented by different types of DTIs instead of binary DTIs. The basic idea underlying the simple logic based approach is that, the types of DTIs are predicted based on profiles of the drug-target pairs with the highest ITP kernel scores in training data. More details of this approach can be found in Algorithm 1.

---

**Algorithm 1** Simple Logic Based Approach

---

**Input:** Training data  $D$ , kernels  $K_d(\cdot, \cdot)$  and  $K_t(\cdot, \cdot)$ ,  
drug-target pair  $(d, t)$  in which types of DTI need to be predicted.

- 1: Find drug  $d_{max}$  and target  $t_{max}$  in training data  $D$ , such that drug-target pairs  $(d, t_{max})$  and  $(d_{max}, t)$  maximize  $K_d(\cdot, \cdot)$  and  $K_t(\cdot, \cdot)$  respectively.
- 2: **if** both drug-target pairs  $(d, t_{max})$  and  $(d_{max}, t)$  have direct (indirect) interaction **then**
- 3:    $\Pr[(d, t) \text{ has direct(indirect) interaction}] = 1.$
- 4: **else**
- 5:   **if** neither drug-target pairs  $(d, t_{max})$  nor  $(d_{max}, t)$  has any interaction **then**
- 6:      $\Pr[(d, t) \text{ has direct or indirect interaction}] = 0.$
- 7:   **else**
- 8:     **if** only one pair of  $(d, t_{max})$  or  $(d_{max}, t)$  has direct (indirect) interaction **then**
- 9:       $\Pr[(d, t) \text{ has direct(indirect) interaction}] = 1.$
- 10:    **else**
- 11:     **if**  $(d, t_{max})$  and  $(d_{max}, t)$  have different interaction types **then**
- 12:       $\Pr[(d, t) \text{ has direct(indirect) interaction}] = \frac{1}{2}.$
- 13:     **end if**
- 14:    **end if**
- 15: **end if**
- 16: **end if**

---

## Supplementary References

- [1] Kevin Bleakley and Yoshihiro Yamanishi. Supervised prediction of drug-target interactions using bipartite local models. *Bioinformatics*, 25(18):2397–2403, Sep 2009.
- [2] Xing Chen, Ming-Xi Liu, and Gui-Ying Yan. Drug-target interaction prediction by random walk on the heterogeneous network. *Mol Biosyst*, 8(7):1970–1978, Jul 2012.
- [3] Feixiong Cheng, Chuang Liu, Jing Jiang, Weiqiang Lu, Weihua Li, Guixia Liu, Weixing Zhou, Jin Huang, and Yun Tang. Prediction of drug-target interactions and drug repositioning via network-based inference. *PLoS Comput Biol*, 8(5):e1002503, 2012.
- [4] Jian-Ping Mei, Chee-Keong Kwoh, Peng Yang, Xiao-Li Li, and Jie Zheng. Drug-target interaction prediction by learning from local information and neighbors. *Bioinformatics*, Nov 2012.
- [5] Paul Shannon, Andrew Markiel, Owen Ozier, Nitin S. Baliga, Jonathan T. Wang, Daniel Ramage, Nada Amin, Benno Schwikowski, and Trey Ideker. Cytoscape: a software environment for integrated models of biomolecular interaction networks. *Genome Res*, 13(11):2498–2504, Nov 2003.
- [6] Twan van Laarhoven, Sander B. Nabuurs, and Elena Marchiori. Gaussian interaction profile kernels for predicting drug-target interaction. *Bioinformatics*, 27(21):3036–3043, Nov 2011.
- [7] Zheng Xia, Ling-Yun Wu, Xiaobo Zhou, and Stephen T C. Wong. Semi-supervised drug-protein interaction prediction from heterogeneous biological spaces. *BMC Syst Biol*, 4 Suppl 2:S6, 2010.
- [8] Lei Xie, Li Xie, Sarah L. Kinnings, and Philip E. Bourne. Novel computational approaches to polypharmacology as a means to define responses to individual drugs. *Annu Rev Pharmacol Toxicol*, 52:361–379, Feb 2012.
- [9] Yoshihiro Yamanishi, Michihiro Araki, Alex Gutteridge, Wataru Honda, and Minoru Kanehisa. Prediction of drug-target interaction networks from the integration of chemical and genomic spaces. *Bioinformatics*, 24(13):i232–i240, Jul 2008.
